**Recognition of gut microbiota by NOD2 is essential for the homeostasis of intestinal intraepithelial lymphocytes**

Wei Jiang, Xiqiong Wang, Benhua Zeng, Lei Liu, Aubry Tardivel, Hong Wei, Jiahuai Han, H. Robson MacDonald, Jurg Tschopp, Zhigang Tian and Rongbin Zhou

Vol. 210, No. 11, October 21, 2013. Pages 2465–2476.

The authors regret that a paragraph in the Adoptive transfer section of the Materials and methods was incorrect. The text has been corrected in the HTML and PDF versions of the text and now appears as follows:

**Adoptive transfer.** For prevention of chemical-induced colitis, CD8<sup>+</sup> IELs or splenic T cells were isolated from wild-type mice and sorted and then were intravenously transferred into *Nod2*<sup>-/-</sup> mice (200  $\mu$ l PBS/10<sup>7</sup> cells). 3 d later, the mice were used to analyze IELs or induce colitis using TNBS or DSS.

For BM chimera experiments, *Nod2*<sup>+/+</sup> or *Nod2*<sup>+/-</sup> BM cells were intravenously transferred into *Rag1*<sup>-/-</sup> mice, or *CD45.1*<sup>+</sup> WT BM cells were intravenously transferred into lethally irradiated (12 Gy given 1 d before adoptive transfer) *Nod2*<sup>+/+</sup> or *Nod2*<sup>+/-</sup> mice, or *Nod2*<sup>+/+</sup> or *Nod2*<sup>+/-</sup> BM cells were intravenously transferred into lethally irradiated *CD45.1*<sup>+</sup> WT mice. After 8 wk, IELs were analyzed by flow cytometry.
